# Supplementary material
Source: Springer Nature journal article supplement (https://www.springermedizin.de/resource/supplementary/12931_2011_1156_MOESM1_ESM.pdf/9425424)

**A**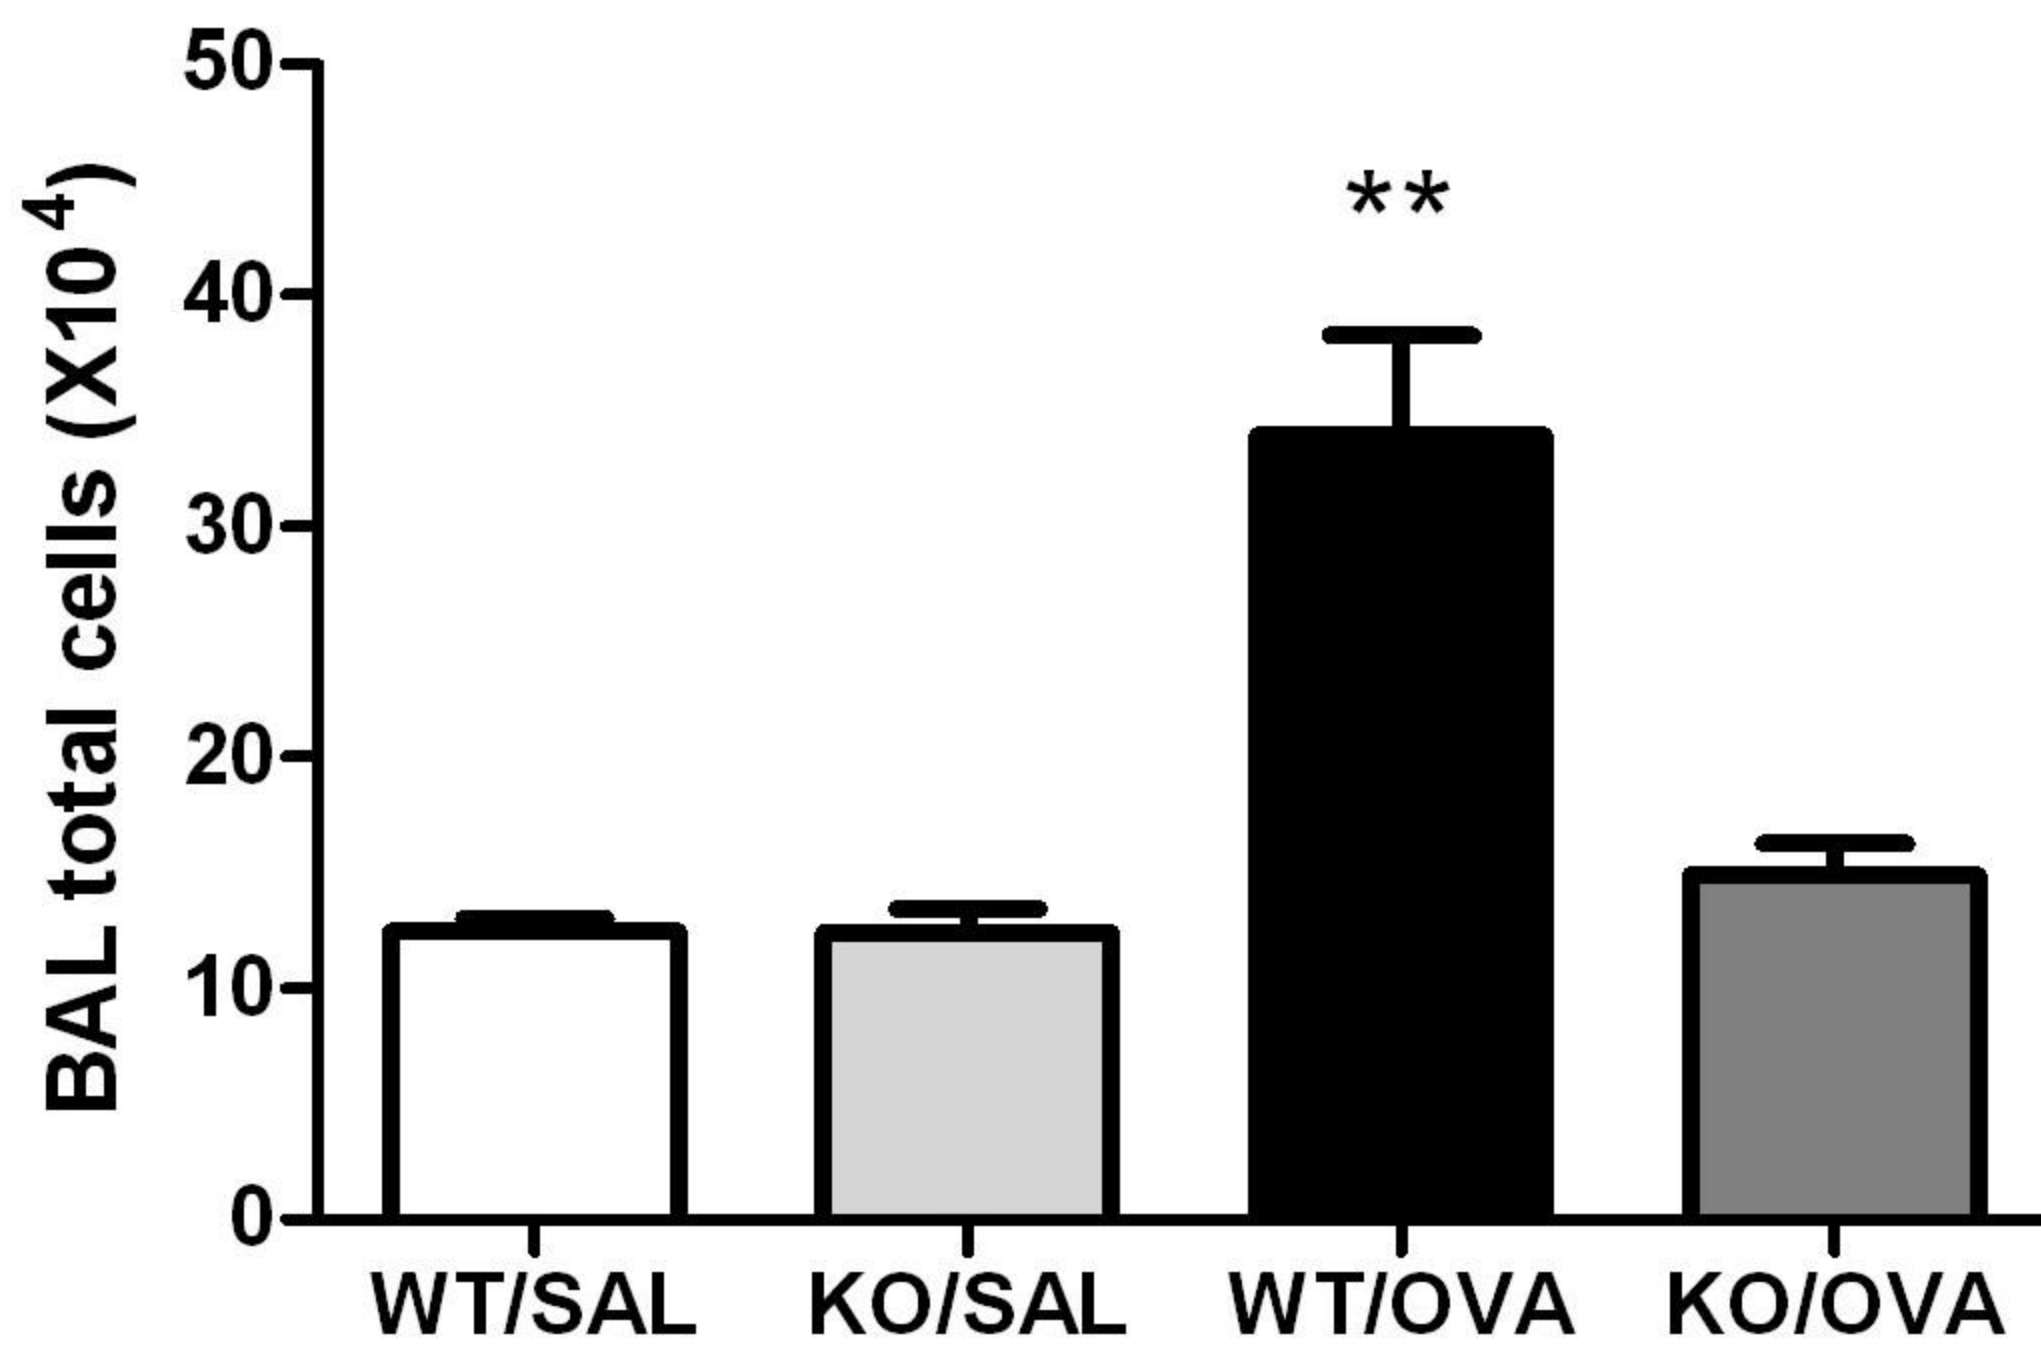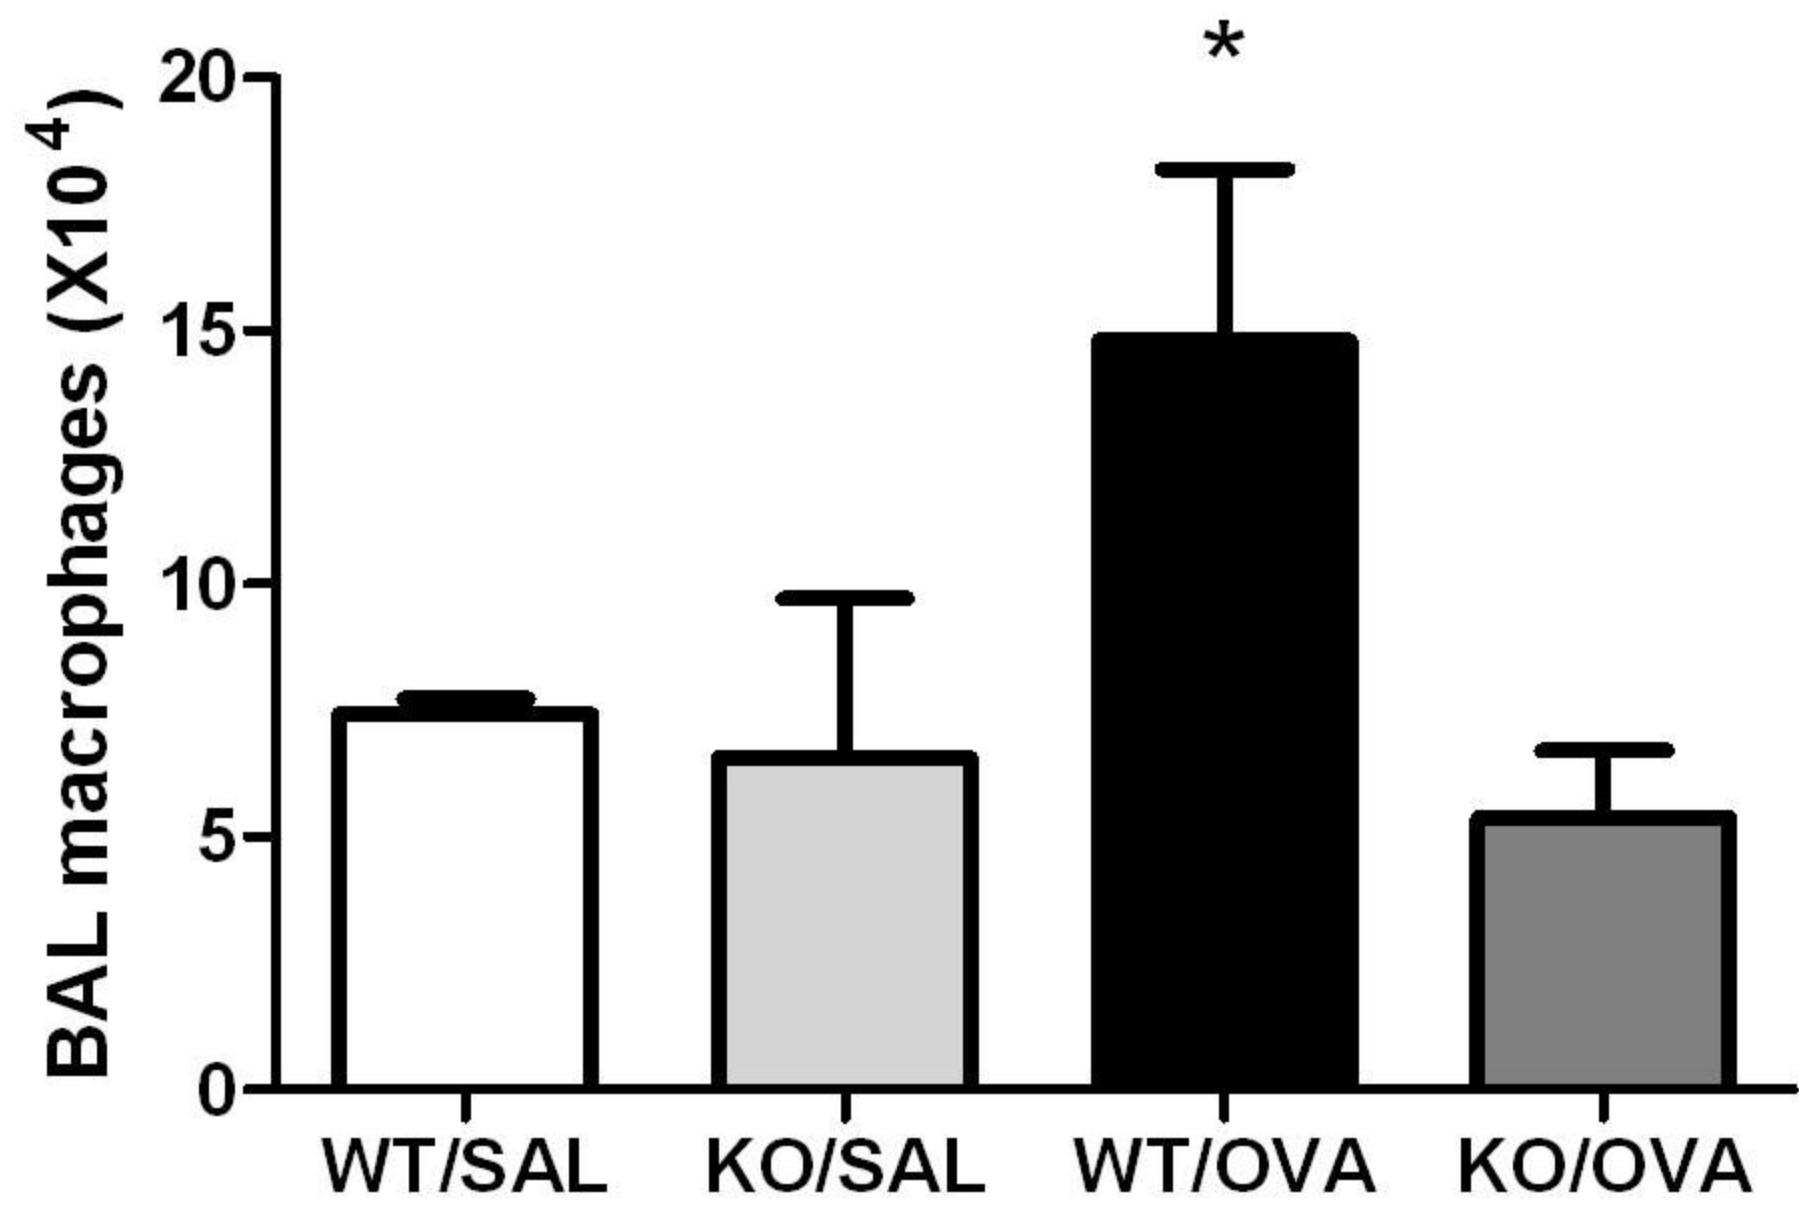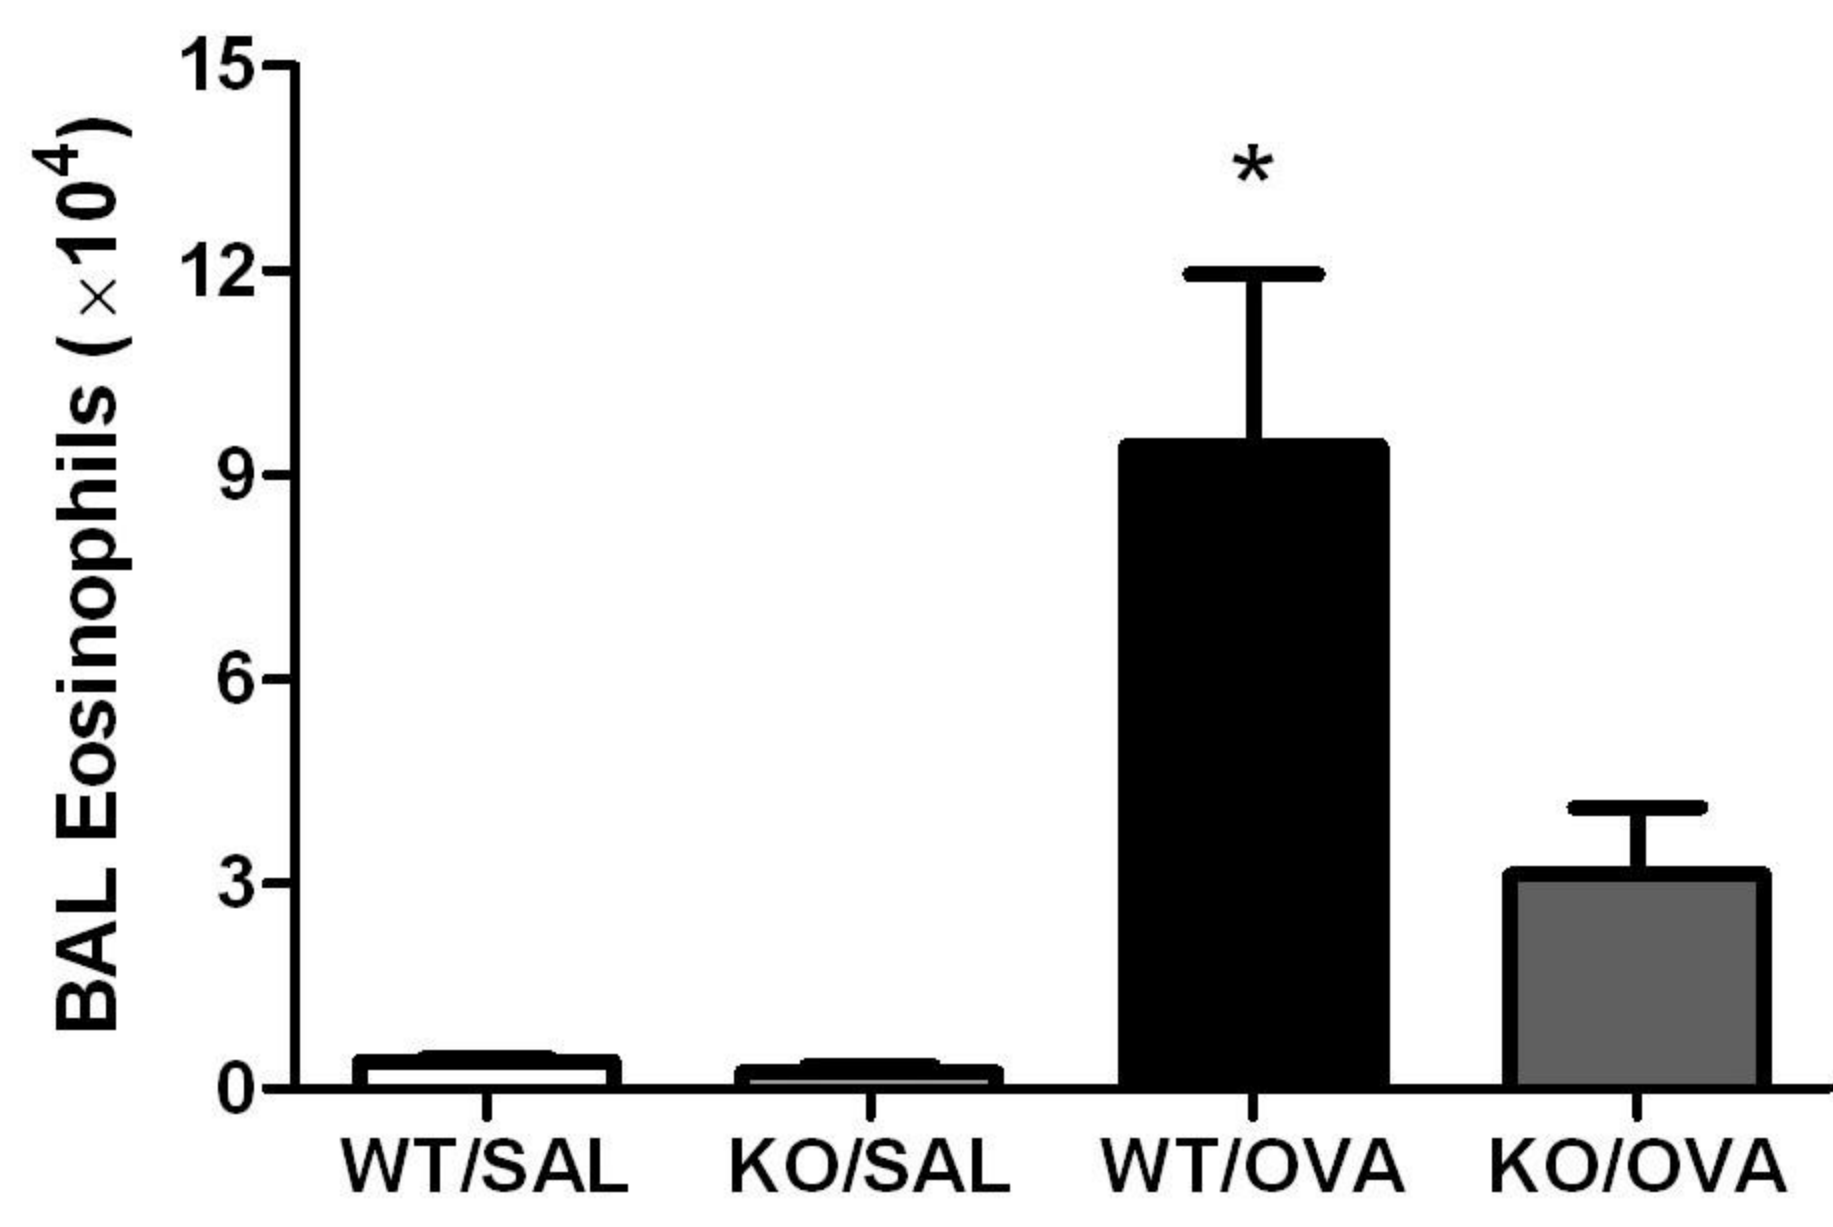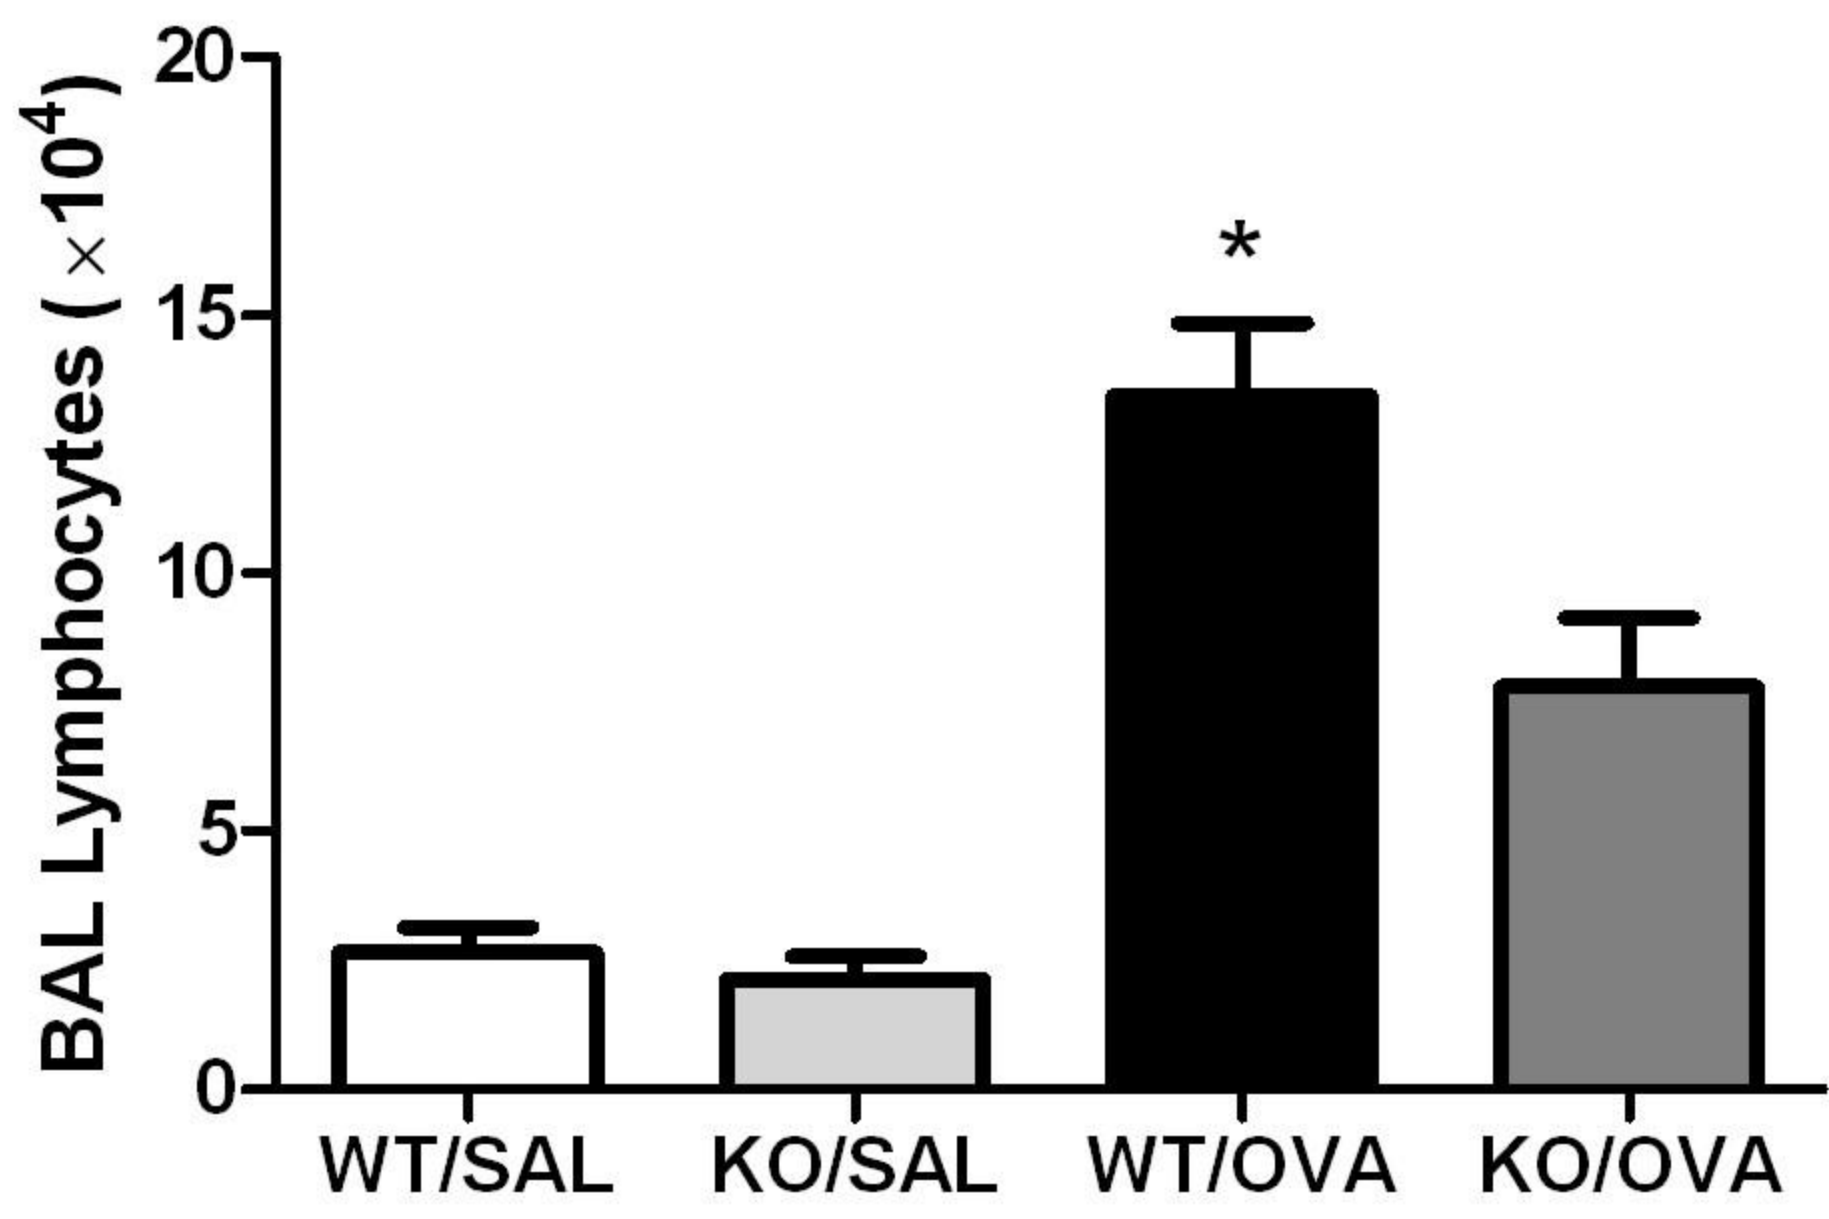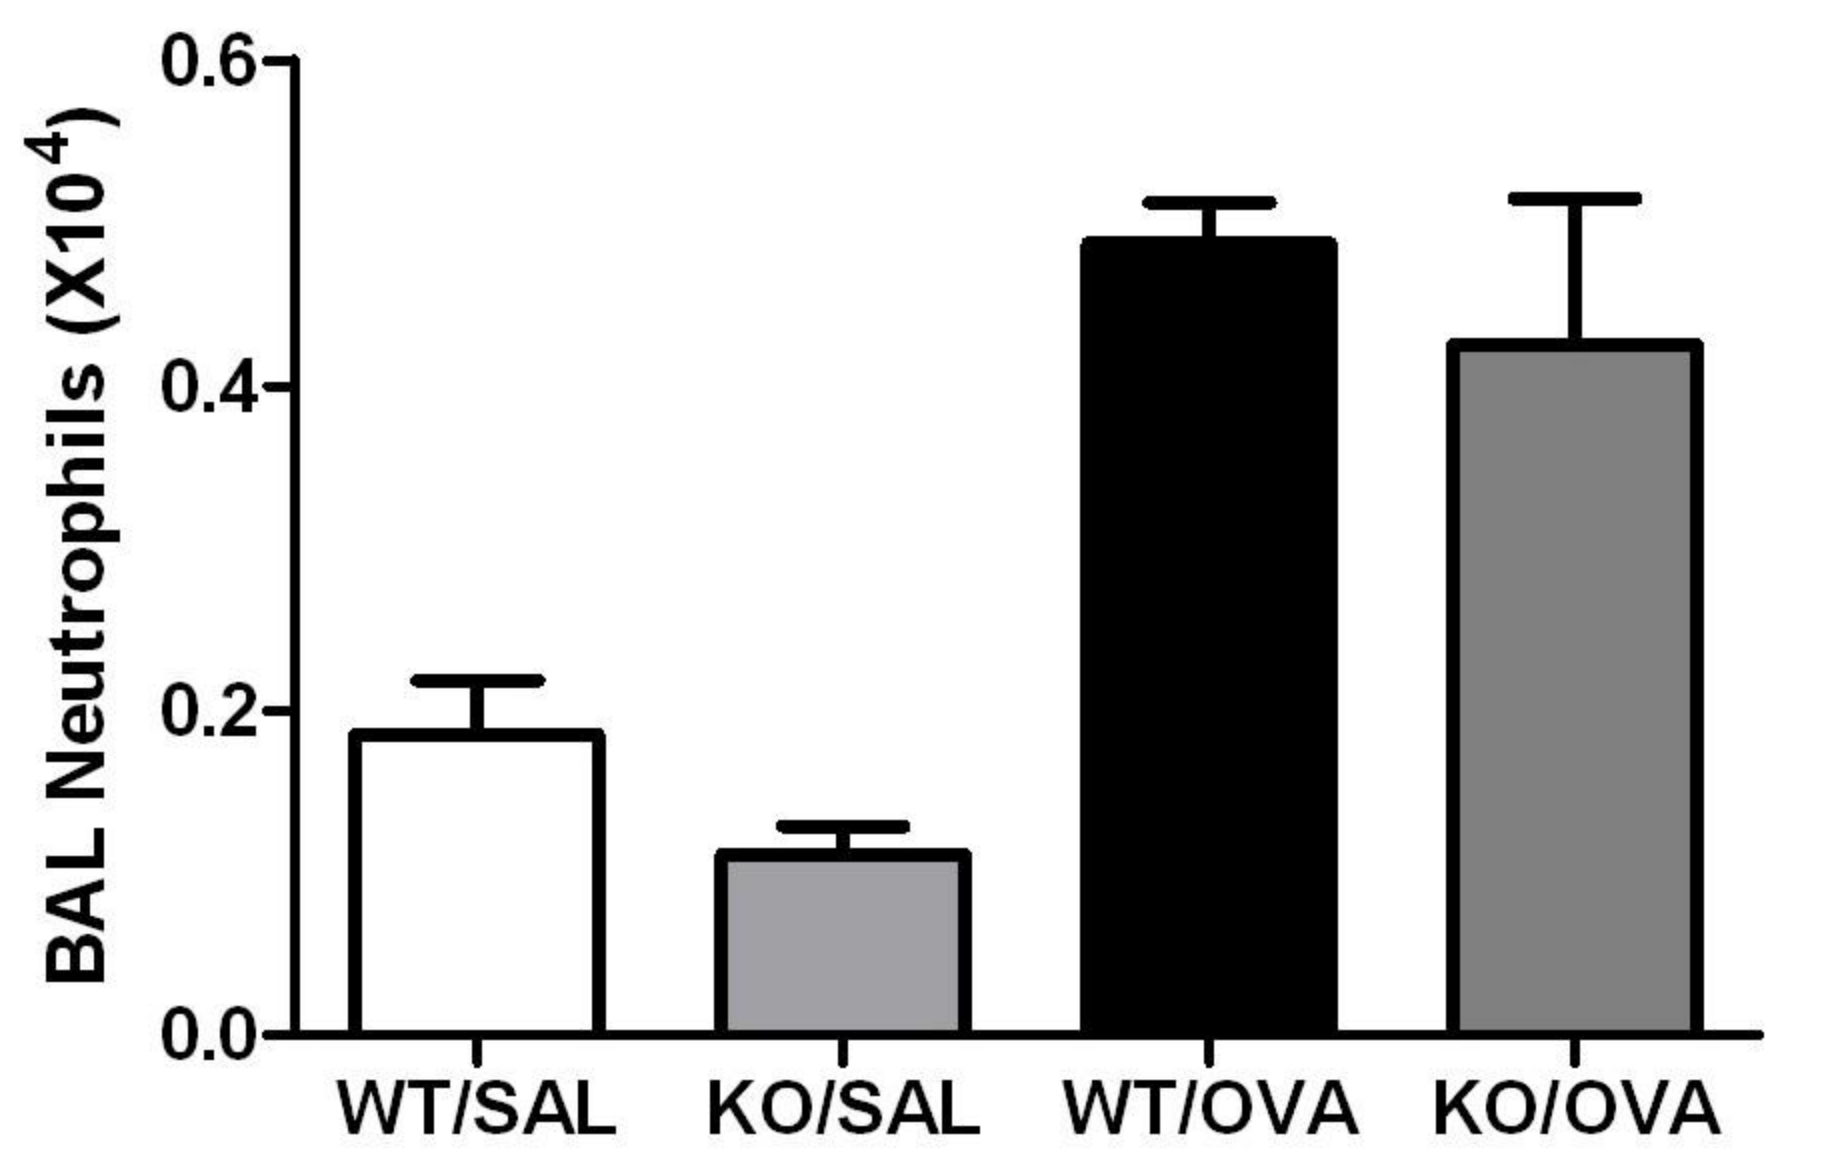**B**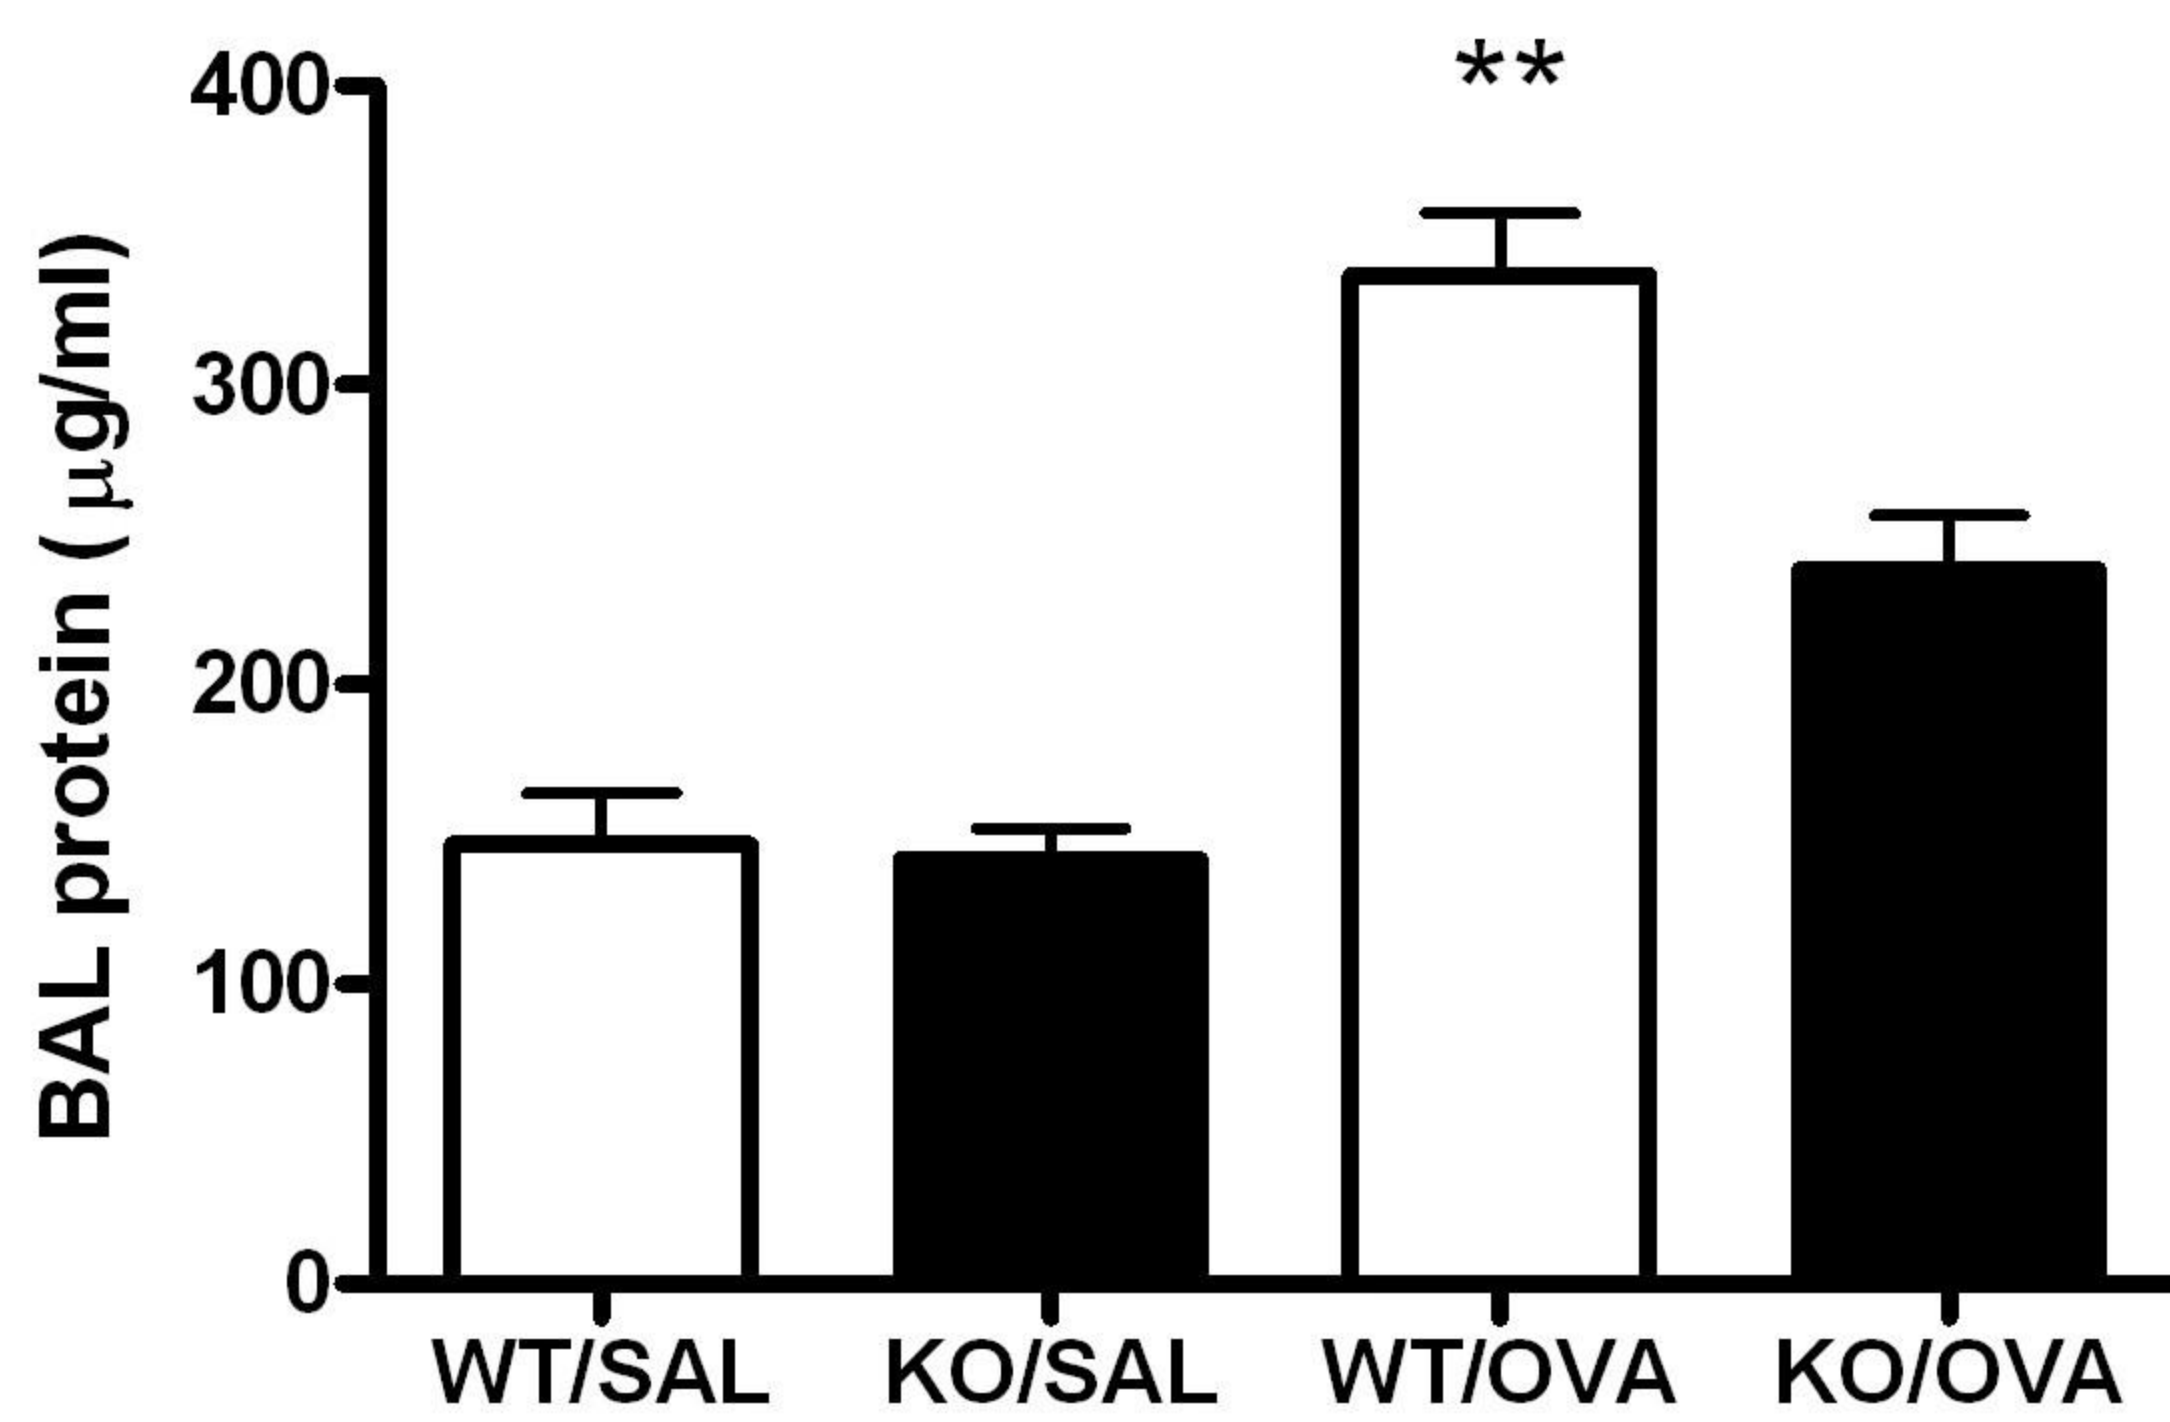

Supplement: MOESM1 [file 9425424]
